# Supplementary material for: A Death Effector Domain Chain DISC Model Reveals a Crucial Role for Caspase-8 Chain Assembly in Mediating Apoptotic Cell Death
Source: PubMed Central journal article supplement (PMC3477315; doi:10.1016/j.molcel.2012.05.004), 2012-07-27
Supplement: mmc1.pdf [file mmc1.pdf]

## **Supplemental Information**

### **A Death Effector Domain Chain DISC Model Reveals a Crucial Role for Caspase-8 Chain Assembly in Mediating Apoptotic Cell Death**

**Laura S. Dickens, Robert S. Boyd, Rebekah Jukes-Jones, Michelle A. Hughes, Gemma L. Robinson, Louise Fairall, John W.R. Schwabe, Kelvin Cain, and Marion MacFarlane**

#### **Inventory of Supplemental Information**

##### **Figure S1, related to Fig. 1**

TRAIL DISC components are exclusively localized in the cleared cell lysate

##### **Figure S2, related to Fig. 1 and Fig. 4**

Known components of the TRAIL DISC were identified by mass spectrometry by multiple peptides and spectra

##### **Figure S3, related to Fig. 2**

Lipid raft markers were not associated with soluble TRAIL DISC (S-DISC)

##### **Figure S4, related to Fig. 5 and Fig. 7**

Putative models for the recruitment of procaspase-8 and other DED-only proteins to the DISC

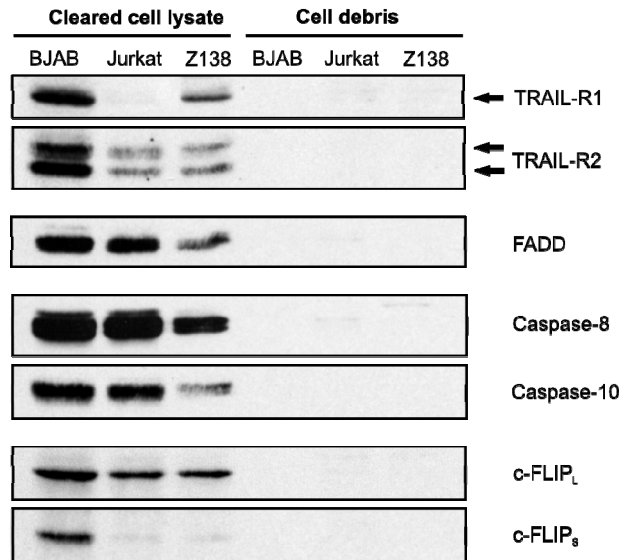

**Figure S1. TRAIL DISC components are exclusively localized in the cleared cell lysate.** BJAB, Jurkat or Z138 cells were stimulated with biotin-labelled (bTRAIL) as described in Experimental Procedures. Following TRAIL DISC formation and subsequent cell lysis, matched volumes of cleared cell lysate and cell debris were separated by SDS-PAGE and analyzed by western blotting for the presence of TRAIL-Rs, FADD, Caspase-8, Caspase-10 and c-FLIP<sub>L</sub> and c-FLIP<sub>S</sub>. In matched samples of cleared cell lysate and cell debris, all core DISC components were exclusively localized in the cleared cell lysate across all three cell lines.

A

O00220 TR10A\_HUMAN TRAIL-R1 - Homo sapiens (Human)

MAPPFARVHL GAFLAVTPNP GSAASGTEAA AATPSKVWGS SAGRIEPRGG  
GRGALPTSMG QHGFSARARA GRAPGPRPAR EASPRLRVHK TFKFVVVVGL  
LQVVPSSAAT IKLHDQSIGT QQWEHSPLGE LCPGSGHRSE HPGACNRCTE  
GVGYTNASNN LFACLPCTAC KSDEEERSPC TTTTNTACQC **KPGTFRNDNS**  
AEMCRKCRSG CPRGMVKVKD CTPWSDIECV HKESGNGHNI WVILVVTVLV  
PLLLVAVLIV CCGIGSGCGP DPKCMDRVCF WRLGLLRGP AEDNAHNEIL  
SNADSLSTFV SEQMESQEP ADLTGVTVQS PGEAQCLLGP AEAEGSQRRR  
**LLVPANGADP TETIMLFFDK FANIVPFDSW DQLMRQLDIT KNEIDVVRAG**  
**TAGPGDALYA MLMKWNKKTG RNASIHTELD ALEMERERHA REKIQDLIVD**  
**SKKFIYLEDG TGSAVSLE**

Q9UBN6 TR10D\_HUMAN TRAIL-R4 - Homo sapiens (Human)

MGLWGQSVPT ASSARAGRYP GARTASGTRP WLLDPKILKF VVFIVAVLLP  
VRVDSATIPR QDEVPQTVA PQQRRLSKE EECFAGSHRS EYTGACNFC  
EGVDYTIASN NLFSCCLCTV CKSGQTNKSS CTTTRDTVCQ CEKGSFQDKN  
SPEMCRCTCT CPRGMVKVVS NCTPRSDIKC KNEAASSTG RTPAAEETVT  
TILGMLASYP HYLLIIVVLV ILLAVVVVGF SCRKKFISYL KIGICSGGGG  
PERVHRVLFRR RSCFSPRVCP AEDNARNETL SNRYLQPTQV SEQEIQGQEL  
AELTGVTVES PEEPQRLLQG AEAEGCQRRR **LLVFNVDADS ADISTLLDAS**  
**ATLEEGHAKI TIQDQVGESE KLFYEDEEAG SATSCL**

Q14790 CASP8\_HUMAN Caspase-8 - Homo sapiens (Human)

MDFSRLNYDI **GEQLDSEDLA SLKFLSLDYI PQRQSPFKD AMLPQRLQE**  
**KRMLEESNLS FLKELLERIN RLDELLITYLN TRKEEMEREL QTPGRAQISA**  
**YRVMLEKQISE EVRSSELRSF KFLQSELSK CKLDDDMMLL DTFIEMEKRV**  
ILGQKLDLIL KRVCAQINKS **ILKIINDVYE FSKERSSLE GSPPEFSNGE**  
ELGCVMTISD **SREQDSBQ TLDKVVQMS KRCYCLLIN NHPAKAREK**  
VPKLSHTRDR NCHLDAGAL TTTPELHFE IKPHDCTIVE QIVYELLKIQ  
LMDHNSMDFC ICCILSHGDK **GLIIVTDCQE APIYELTSQV GNLKCPSLAG**  
KPKVFFQAC **QCDNYQKIP VETDSSEQPY LEMDLSSPT RYIPDEADF**  
LGMATVNNCV SYRNPAGETW YIQSLCQLSR ERCPGR**DDIL TILTEVNYEV**  
**SNKDKKNGM KMQPQPTFL RKKLVPFSD**

O15519 CFLAR\_HUMAN c-FLIP - Homo sapiens (Human)

MSAEVIHQVE EALDTDEKEM LLFLCRDVAI **DVVFPNVDL LDILREGRKL**  
**SVGDLAELLY RVRRFDLKR ILKMDRKA VE THLLRNPHLV SDYRVLMAEI**  
GEDLDKSDVS SLIFLMKDYM GRGKISKEKS **FIDLIVVELEK LNLVAPDQLD**  
LLEKCLKNIH RIDLKTQIK **YKQSVQAGT SYRNVLAQAI QKSLKDPNSN**  
FRLNHRGSK EQLKEQLGAQ QEPVKKSIE SEAFLPQSIP EERYKMSKFP  
LGCILIDICI GNETELLRDT **FTSLGYEVQK FLHLSMHGIS QILGQFACMP**  
EHRDYDSFVC **VLVSRGGSQS VYGVDTQHS LPLHHIRMF MGDSCPYLAG**  
KPKMFFIQNY VVSEGLQEDS **SLEVDGPAM KNVEFKAQKR GLCTVHREAD**  
FFWNSLCTADM SLLEQSHSP SLYLQCLSQY LRQERKRPLL DLHIELNGYM  
YDWNRSVSAK ERYVWLOHT LRKKLILSYT

O14763 TR10B\_HUMAN TRAIL-R2 - Homo sapiens (Human)

MEQRGQNAFA ASGARKRHGP GPREARGARP GPRVPKTLVL VVAIVLLLV  
AESALITQDQ LAPQORAAPO QKRSSPSEGL CPPGHHSIED GRDCISCKY  
QDYSTHWNLD LFLRCTRCD **SGEVLSPECT TTRNTVCQCE ECTFREEDSP**  
EMCRKCRCTC PRGMVKVGD C TPWSDIECVH KESGTHKSGE VPAVEETVTS  
SPGTPASPCS LSGIIGVTV AAVVLIVAVE VCKSLLWKKV LPYLK**GICSG**  
**GGDPERVDR SSQRPGAEDN VLNVLIVLQ PTOVPEQEME VQEPABPTGV**  
NMLSPGESH LLEPAEAERS **QRRRLIVPAN EGDPTETLRQ CFDDFADLVP**  
FDSWEPLMRK **LGLMDNEIKV AKAEAAGHRD TLYTMLIKW NKTGFDASVH**  
**TLLDALETLG ERLAKQKIED HLLSSGKFMV LEGNADSAMS**

Q13158 FADD\_HUMAN FADD - Homo sapiens (Human)

MDPFLVLLHS VSSLSLSEEL TELKFLCLGR VGKRLKERVQ **SGLDLFSMLL**  
**EQNDLEFGHT ELLRELLASL RRHDLRRVD DFEAGAAAGA APGEEDLCAA**  
FNVICDNVGH DWRLRLARQLK **VSDTKIDSIE DRVYRNTER VRESLRIWKN**  
**TEKENATVAK LVGALRSCQM NLIVDLVQEV QQARLDQNRV GAMS PMSWNS**  
DASTSEAS

Q92851 CASPA\_HUMAN Caspase-10 - Homo sapiens (Human)

MKSQQQHWYS SSKNKCVSF REKLLIDSN LGVQDVENLK FLCIGLVPNK  
KLEKSSASD VFEHLAEDL LSEEDPFFLA ELLYIIRQK LQHLNCTKE  
EVERLLPFRQ **RVSFLRNLLY ELSGSDSEN LKMIFPLAK** **SLKREMTSL**  
**SFLAFLEKQG KIDEDNLICL EDLCKTVVPK LLRNLEKYNR EKAIGIVTTP**  
VDKBAESYQG EELVSDTDV KTFLEALPQE SWQNKHAGSN GNRATNGAPS  
LVSRMGGAS ANTLNSETST KRAAVYRMMR NHRGLQVIVN NHPSTSLKDR  
QCTHKDAEIL SHVFQWLGFT VHIHNNVTKV HEMVWLQKQ CNPAHADGDC  
FVFCILTHGR **FCAVYSDEA LPIREINSH FALQCPRLA EKPILFFIOA**  
CQCEEQSPV SIEADALNPE QAPTSLQDSI PAEAEFLGL ATVPYGVYFR  
HYEGSWYIQ SLCNHLKLV FRMLKFEKI MEIRGRKRVG WGAQISATS  
LPTAISQTF RPPRRRNVSSV S

B

|            | High molecular weight BJAB TRAIL DISC |              |
|------------|---------------------------------------|--------------|
|            | Experiment 1                          | Experiment 2 |
| TRAIL      | 22                                    | 16           |
| TRAIL-R1   | 18                                    | 8            |
| TRAIL-R2   | 15                                    | 6            |
| FADD       | 4                                     | 2            |
| Caspase-8  | 81                                    | 40           |
| Caspase-10 | 2                                     | 0            |
| c-FLIP     | 7                                     | 0            |

Figure S2. Known components of the TRAIL DISC were identified by mass spectrometry by multiple peptides and spectra.

(A) Known components were identified by good peptide coverage. Peptides, corresponding to the known components of the TRAIL DISC, identified by mass spectrometry are depicted in bold. Red bold peptides were identified following mass spectrometry of the HMW BJAB TRAIL DISC (50 % peptide and protein probabilities, MudPit analysis). Black bold peptides are additional peptides that were identified by mass spectrometry of unfractonated TRAIL DISC isolated from BJAB, Jurkat or Z138 cells (50 % peptide and protein probabilities).

(B) Mass spectrometry of HMW weight BJAB TRAIL DISC resulted in the identification of multiple spectra for the known components. Numbers are the total assigned spectra for each known component across two experiments.

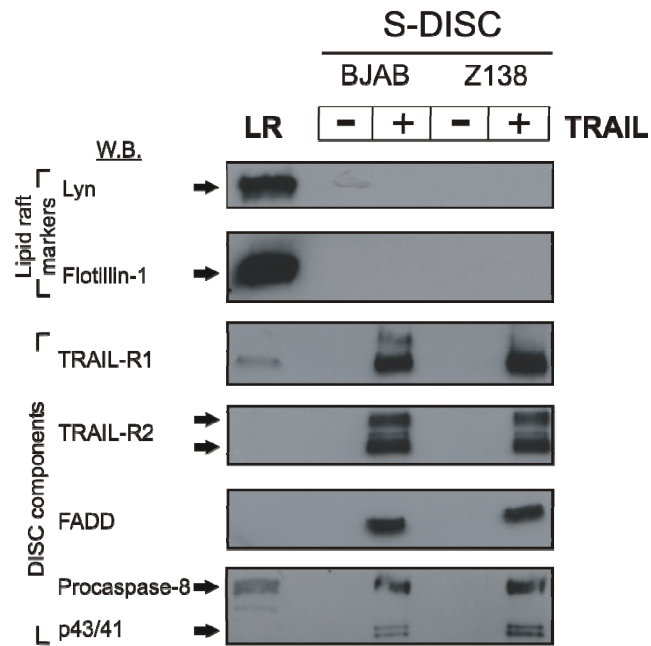

**Figure S3 Lipid raft markers were not associated with soluble TRAIL DISC (S-DISC).**

Lipid raft markers are not associated with TRAIL DISC isolated from the soluble fraction of cells. TRAIL DISC was isolated from the soluble fraction of TRAIL treated BJAB or Z138 cells (S-DISC) and the presence of Lyn and Flotillin-1 (lipid raft markers) was investigated by western blotting. LR, Lipid raft fraction.

Figure S4

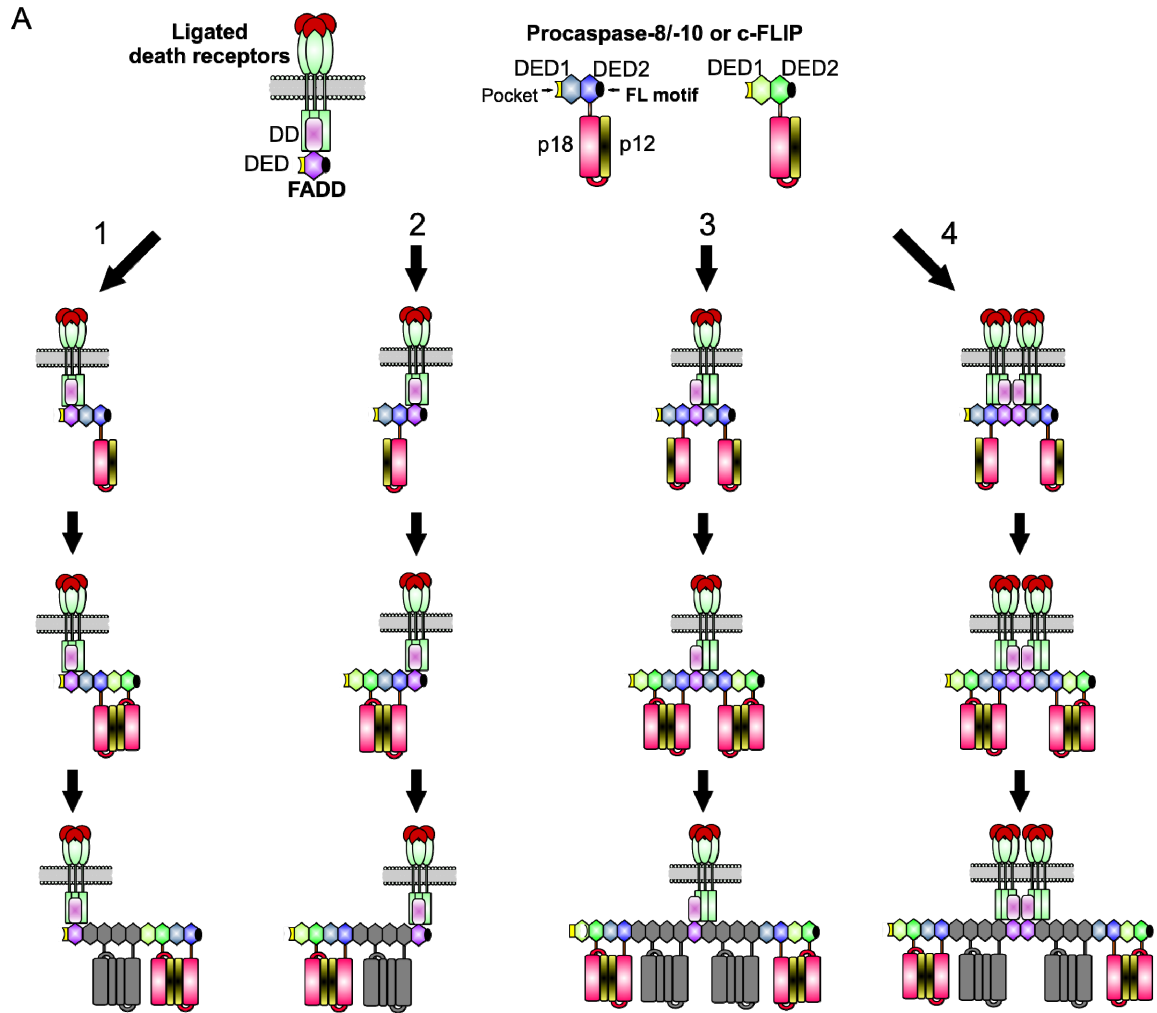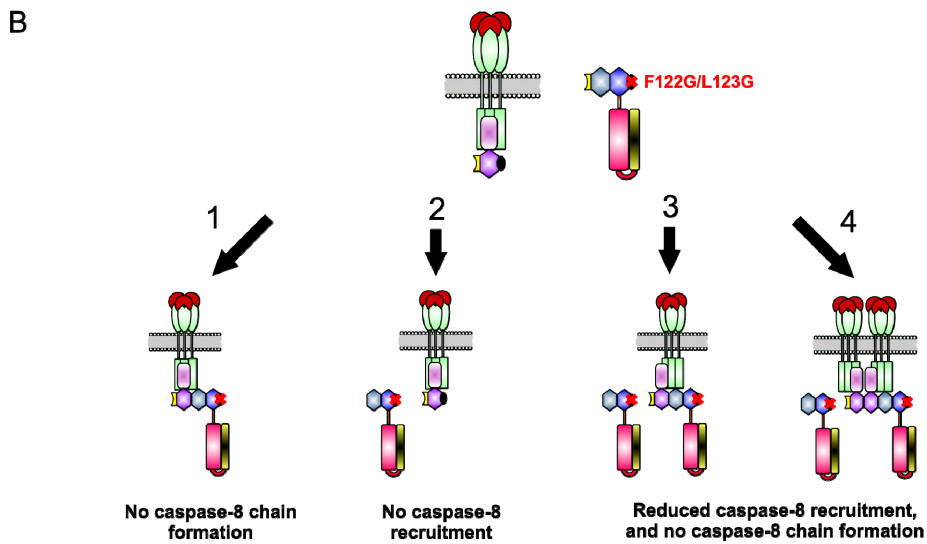

**Figure S4 Putative models for the recruitment of procaspase-8 and other DED-only proteins to the DISC.**

(A) Upon stimulation by the appropriate death ligand, death receptors recruit FADD via their death domains (DDs). FADD in turn recruits procaspase-8 (or procaspase-10 or c-FLIP) through a death effector domain (DED)-mediated interaction. FADD may initially recruit one molecule of procaspase-8 via a single interaction with either DED1 (model 1; see also Figure 7A) or DED2 (model 2). Alternatively, FADD may recruit two DED-only proteins, one via DED1 and the other via DED2 (model 3). In a final variation, FADD from different receptor complexes may self-associate and then caspase-8 chain formation could proceed from each FADD molecule (model 4). We propose that, once bound to the DISC, DED-only proteins are then able to use their exposed binding sites (pocket or FL motif) to recruit additional molecules to produce a chain enabling dimerization and full activation of caspase-8/10. (B) Mutation of the FL motif in caspase-8 DED2 (F122G/L123G) will affect each model differently. In model 1, DED2 mutant caspase-8 is still recruited to FADD via DED1 but is unable to form a chain, whilst in model 2, DED2 mutant caspase-8 cannot be recruited to FADD. In models 3 or 4, DED2 caspase-8 recruitment to FADD is reduced, as only DED1 can interact with FADD, and caspase-8 chains cannot form through mutated DED2.
